# Supplementary material for: The Relationship between Wellbeing, Self-Determination, and Resettlement Stress for Asylum-Seeking Mothers Attending an Ecosocial Community-Based Intervention: A Mixed-Methods Study
Source: MDPI journal article supplement (doi:10.3390/ijerph20227076), 2023-11-17
Supplement: s1 [file s1]

**Table S1: Preliminary analyses***Hierarchical regression analysis on predictors for subjective wellbeing*

| Predictor          | B      | SE B  | $\beta$ | t      | p      | VIF    | $\Delta R^2$ | R <sup>2</sup> |
|--------------------|--------|-------|---------|--------|--------|--------|--------------|----------------|
| <b>Model 1</b>     |        |       |         |        |        |        |              | -.080          |
| Constant           | 4.316  | 2.131 |         | 2.025  | 0.053  |        |              |                |
| Age                | -0.007 | 0.035 | -0.047  | -0.211 | 0.835  | 1.654  |              |                |
| Education          | -0.119 | 0.500 | -0.050  | -0.238 | 0.814  | 1.474  |              |                |
| Civil status       |        |       |         |        |        |        |              |                |
| 6 - 1              | 0.141  | 1.900 | 0.020   | 0.074  | 0.942  | 2.456  |              |                |
| 4 - 1              | -0.362 | 1.828 | -0.052  | -0.198 | 0.845  | 2.273  |              |                |
| 3 - 1              | 1.774  | 2.399 | 0.253   | 0.740  | 0.466  | 3.914  |              |                |
| 2 - 1              | 0.133  | 1.328 | 0.036   | 0.100  | 0.921  | 4.395  |              |                |
| No. of children    | 0.000  | 0.218 | 0.000   | -0.002 | 0.999  | 1.343  |              |                |
| Length of stay     | -0.103 | 0.049 | -0.783  | -2.101 | 0.045  | 4.634  |              |                |
| Program attendance | 0.434  | 0.199 | 0.657   | 2.183  | 0.038  | 3.022  |              |                |
| <b>Model 2</b>     |        |       |         |        |        |        | 0.096        | 0.016          |
| Constant           | 1.620  | 2.477 |         | 0.654  | 0.519  |        |              |                |
| Age                | 0.002  | 0.034 | 0.012   | 0.055  | 0.957  | 1.689  |              |                |
| Education          | -0.130 | 0.477 | -0.054  | -0.271 | 0.788  | 1.474  |              |                |
| Civil status       |        |       |         |        |        |        |              |                |
| 6 - 1              | -0.344 | 1.831 | -0.049  | -0.188 | 0.853  | 2.504  |              |                |
| 4 - 1              | -0.265 | 1.745 | -0.038  | -0.152 | 0.881  | 2.275  |              |                |
| 3 - 1              | 1.524  | 2.293 | 0.218   | 0.665  | 0.512  | 3.927  |              |                |
| 2 - 1              | 0.478  | 1.280 | 0.131   | 0.374  | 0.712  | 4.485  |              |                |
| No. of children    | 0.049  | 0.210 | 0.045   | 0.235  | 0.816  | 1.364  |              |                |
| Length of stay     | -0.081 | 0.048 | -0.616  | -1.679 | 0.105  | 4.917  |              |                |
| Program attendance | 0.371  | 0.192 | 0.562   | 1.928  | 0.065  | 3.113  |              |                |
| Self-Efficacy      | 0.644  | 0.337 | 0.356   | 1.909  | 0.067  | 1.271  |              |                |
| <b>Model 3</b>     |        |       |         |        |        |        | 0.334        | 0.350          |
| Constant           | -1.327 | 2.159 |         | -0.614 | 0.544  | -1.327 |              |                |
| Age                | 0.012  | 0.028 | 0.075   | 0.425  | 0.674  | 0.012  |              |                |
| Education          | -0.086 | 0.388 | -0.036  | -0.220 | 0.827  | -0.086 |              |                |
| Civil status       |        |       |         |        |        |        |              |                |
| 6 - 1              | 0.564  | 1.508 | 0.081   | 0.374  | 0.712  | 2.569  |              |                |
| 4 - 1              | 0.146  | 1.423 | 0.021   | 0.103  | 0.919  | 2.288  |              |                |
| 3 - 1              | 4.092  | 1.984 | 0.584   | 2.062  | 0.050  | 4.447  |              |                |
| 2 - 1              | 1.256  | 1.061 | 0.344   | 1.184  | 0.247  | 4.660  |              |                |
| No. of children    | 0.019  | 0.171 | 0.018   | 0.112  | 0.912  | 1.367  |              |                |
| Length of stay     | -0.140 | 0.042 | -1.056  | -3.301 | 0.003  | 5.668  |              |                |
| Program attendance | 0.602  | 0.168 | 0.913   | 3.585  | 0.001  | 3.588  |              |                |
| Self-Efficacy      | 0.119  | 0.307 | 0.066   | 0.387  | 0.702  | 1.596  |              |                |
| Need satisfaction  | 0.574  | 0.152 | 0.621   | 3.784  | <0.001 | 1.488  |              |                |

*N* = 38

*Hierarchical regression analysis on predictors for adaptive stress*

| Predictor          | B      | SE B  | $\beta$ | t      | p      | VIF   | $\Delta R^2$ | R <sup>2</sup> |
|--------------------|--------|-------|---------|--------|--------|-------|--------------|----------------|
| <b>Model 1</b>     |        |       |         |        |        |       |              | -.136          |
| Constant           | 1.840  | 1.062 |         | 1.733  | 0.095  |       |              |                |
| Age                | -0.016 | 0.018 | -0.212  | -0.889 | 0.382  | 1.753 |              |                |
| Education          | 0.081  | 0.256 | 0.071   | 0.316  | 0.754  | 1.545 |              |                |
| Civil status       |        |       |         |        |        |       |              |                |
| 6 - 1              | 1.101  | 0.948 | 0.329   | 1.161  | 0.256  | 2.473 |              |                |
| 4 - 1              | 0.422  | 0.909 | 0.126   | 0.464  | 0.646  | 2.274 |              |                |
| 3 - 1              | 0.533  | 1.196 | 0.159   | 0.445  | 0.660  | 3.934 |              |                |
| 2 - 1              | 0.480  | 0.660 | 0.274   | 0.727  | 0.474  | 4.382 |              |                |
| No. of children    | 0.060  | 0.109 | 0.115   | 0.552  | 0.586  | 1.343 |              |                |
| Length of stay     | 0.019  | 0.025 | 0.299   | 0.750  | 0.460  | 4.887 |              |                |
| Program attendance | -0.134 | 0.101 | -0.423  | -1.329 | 0.196  | 3.117 |              |                |
| <b>Model 2</b>     |        |       |         |        |        |       | 0.007        | -0.129         |
| Constant           | 2.650  | 1.299 |         | 2.040  | 0.052  |       |              |                |
| Age                | -0.020 | 0.019 | -0.259  | -1.073 | 0.294  | 1.813 |              |                |
| Education          | 0.094  | 0.256 | 0.082   | 0.368  | 0.716  | 1.548 |              |                |
| Civil status       |        |       |         |        |        |       |              |                |
| 6 - 1              | 1.258  | 0.957 | 0.376   | 1.315  | 0.200  | 2.532 |              |                |
| 4 - 1              | 0.389  | 0.907 | 0.116   | 0.428  | 0.672  | 2.276 |              |                |
| 3 - 1              | 0.592  | 1.194 | 0.177   | 0.496  | 0.624  | 3.942 |              |                |
| 2 - 1              | 0.376  | 0.665 | 0.215   | 0.565  | 0.577  | 4.476 |              |                |
| No. of children    | 0.046  | 0.109 | 0.089   | 0.423  | 0.676  | 1.362 |              |                |
| Length of stay     | 0.013  | 0.026 | 0.209   | 0.516  | 0.611  | 5.101 |              |                |
| Program attendance | -0.119 | 0.102 | -0.375  | -1.170 | 0.253  | 3.179 |              |                |
| Self-Efficacy      | -0.191 | 0.177 | -0.219  | -1.076 | 0.292  | 1.279 |              |                |
| <b>Model 3</b>     |        |       |         |        |        |       | 0.394        | 0.265          |
| Constant           | 4.245  | 1.129 |         | 3.760  | <.001  |       |              |                |
| Age                | -0.027 | 0.015 | -0.354  | -1.800 | 0.085  | 1.842 |              |                |
| Education          | 0.094  | 0.206 | 0.082   | 0.453  | 0.654  | 1.548 |              |                |
| Civil status       |        |       |         |        |        |       |              |                |
| 6 - 1              | 0.822  | 0.780 | 0.245   | 1.053  | 0.303  | 2.588 |              |                |
| 4 - 1              | 0.163  | 0.734 | 0.049   | 0.222  | 0.826  | 2.291 |              |                |
| 3 - 1              | -0.772 | 1.028 | -0.231  | -0.751 | 0.460  | 4.491 |              |                |
| 2 - 1              | -0.038 | 0.548 | -0.021  | -0.069 | 0.946  | 4.660 |              |                |
| No. of children    | 0.063  | 0.088 | 0.122   | 0.718  | 0.479  | 1.365 |              |                |
| Length of stay     | 0.045  | 0.022 | 0.716   | 2.025  | 0.054  | 5.949 |              |                |
| Program attendance | -0.246 | 0.089 | -0.774  | -2.775 | 0.011  | 3.706 |              |                |
| Self-Efficacy      | 0.073  | 0.159 | 0.084   | 0.462  | 0.648  | 1.582 |              |                |
| Need satisfaction  | -0.299 | 0.079 | -0.674  | -3.796 | <0.001 | 1.501 |              |                |

N = 38
